# Supplementary material
Source: PubMed Central journal article supplement (PMC3658096)
Supplement: supp_kws314_kws314_Web_TAbles.pdf [file supp_kws314_kws314_Web_TAbles.pdf]

Web Table 1. Age-breakdown of excess all-cause deaths by 4 statistical methods and 4 measures of influenza activity, assuming a 1-week lag between influenza incidence and death.

|                                        | Influenza incidence proxy        |            |         |            |     |           |     |            |
|----------------------------------------|----------------------------------|------------|---------|------------|-----|-----------|-----|------------|
|                                        | Age-standardized incidence proxy |            | ILI×LAB |            | ILI |           | LAB |            |
|                                        | No.                              | (95% CI)   | No.     | (95% CI)   | No. | (95% CI)  | No. | (95% CI)   |
| <b>By time series regression model</b> |                                  |            |         |            |     |           |     |            |
| 0-4y                                   | -8                               | (-13, -3)  | -6      | (-11, 0)   | -12 | (-18, -7) | -9  | (-15, -4)  |
| 5-14y                                  | -3                               | (-17, 12)  | -2      | (-16, 13)  | -1  | (-16, 14) | -3  | (-19, 12)  |
| 15-29y                                 | 2                                | (-31, 35)  | 1       | (-30, 33)  | 7   | (-26, 41) | 3   | (-31, 36)  |
| 30-39y                                 | 2                                | (-23, 28)  | 0       | (-24, 25)  | 5   | (-21, 31) | 3   | (-24, 29)  |
| 40-49y                                 | 8                                | (-22, 37)  | -3      | (-31, 25)  | 13  | (-17, 43) | 11  | (-19, 41)  |
| 50-59y                                 | 1                                | (-24, 26)  | -7      | (-31, 17)  | -31 | (-56, -5) | -5  | (-31, 20)  |
| 60-69y                                 | 47                               | (22, 72)   | 43      | (19, 68)   | 63  | (37, 88)  | 63  | (38, 88)   |
| ≥70y                                   | 184                              | (112, 256) | 180     | (110, 250) | 99  | (26, 173) | 138 | (65, 211)  |
| Overall                                | 232                              | (136, 328) | 208     | (114, 302) | 143 | (45, 242) | 200 | (101, 298) |
| <b>By linear regression model</b>      |                                  |            |         |            |     |           |     |            |
| 0-4y                                   | -8                               | (-14, -3)  | -6      | (-11, -1)  | -13 | (-18, -7) | -9  | (-15, -4)  |
| 5-14y                                  | -3                               | (-6, 0)    | -2      | (-5, 1)    | -1  | (-4, 2)   | -3  | (-7, 0)    |
| 15-29y                                 | 6                                | (-3, 15)   | 5       | (-5, 14)   | 13  | (4, 23)   | 8   | (-1, 17)   |
| 30-39y                                 | 3                                | (-6, 12)   | 1       | (-8, 10)   | 6   | (-4, 15)  | 3   | (-6, 13)   |
| 40-49y                                 | 15                               | (-2, 33)   | 4       | (-13, 22)  | 25  | (7, 42)   | 21  | (3, 38)    |

|         |                |                |               |                |
|---------|----------------|----------------|---------------|----------------|
| 50-59y  | 6 (-23, 34)    | -3 (-31, 26)   | -21 (-49, 8)  | 2 (-27, 30)    |
| 60-69y  | 46 (13, 80)    | 43 (9, 76)     | 62 (28, 95)   | 62 (29, 95)    |
| ≥70y    | 184 (87, 281)  | 180 (83, 277)  | 99 (2, 196)   | 138 (41, 234)  |
| Overall | 249 (140, 358) | 222 (113, 331) | 170 (61, 278) | 221 (112, 329) |

**By Poisson regression model with log link**

|         |                |                |               |                |
|---------|----------------|----------------|---------------|----------------|
| 0-4y    | -8 (-14, -3)   | -6 (-11, 0)    | -12 (-17, -7) | -9 (-14, -4)   |
| 5-14y   | -3 (-6, -1)    | -2 (-4, 1)     | -2 (-4, 1)    | -4 (-6, -1)    |
| 15-29y  | 2 (-5, 8)      | 1 (-6, 8)      | 7 (-1, 14)    | 2 (-5, 9)      |
| 30-39y  | 2 (-7, 12)     | 0 (-9, 10)     | 5 (-5, 14)    | 3 (-7, 12)     |
| 40-49y  | 13 (-3, 28)    | 2 (-14, 18)    | 20 (4, 35)    | 17 (1, 32)     |
| 50-59y  | 4 (-21, 30)    | -4 (-30, 21)   | -24 (-49, 1)  | -1 (-26, 25)   |
| 60-69y  | 33 (5, 61)     | 31 (3, 59)     | 42 (14, 70)   | 44 (16, 72)    |
| ≥70y    | 197 (126, 268) | 190 (118, 261) | 119 (48, 190) | 153 (82, 224)  |
| Overall | 240 (157, 323) | 213 (130, 297) | 155 (72, 237) | 205 (112, 288) |

**By Poisson regression model with identity link**

|        |              |              |               |              |
|--------|--------------|--------------|---------------|--------------|
| 0-4y   | -9 (-14, -4) | -6 (-11, 0)  | -12 (-17, -7) | -9 (-14, -4) |
| 5-14y  | -4 (-6, -1)  | -2 (-5, 0)   | -2 (-5, 1)    | -5 (-7, -2)  |
| 15-29y | 5 (-3, 13)   | 4 (-4, 12)   | 12 (4, 20)    | 7 (-1, 15)   |
| 30-39y | 2 (-2, 31)   | 0 (-10, 11)  | 5 (-5, 15)    | 3 (-7, 13)   |
| 40-49y | 15 (-20, 32) | 3 (-13, 20)  | 25 (-9, 42)   | 21 (5, 38)   |
| 50-59y | 6 (17, 77)   | -3 (-29, 23) | -21 (-47, 5)  | 1 (-25, 27)  |

|         |                |                |                |                |
|---------|----------------|----------------|----------------|----------------|
| 60-69y  | 47 (17, 77)    | 44 (14, 74)    | 65 (35, 94)    | 64 (34, 94)    |
| ≥70y    | 201 (129, 273) | 193 (120, 265) | 128 (56, 200)  | 160 (88, 232)  |
| Overall | 264 (179, 349) | 233 (148, 319) | 200 (115, 285) | 243 (158, 327) |

ILI = influenza like illness based on general practitioners (GP) consultations; LAB = laboratory specimens positive for influenza; ILI×LAB

= GP consultations associated with influenza.

Web Table 2. Estimated overall excess all-cause deaths by 4 statistical methods and 4 measures of influenza activity, assuming 0-week and 2-week lags between influenza incidence and death.

| Lag        | Statistical model                     | Influenza incidence proxy        |           |         |           |     |            |     |            |
|------------|---------------------------------------|----------------------------------|-----------|---------|-----------|-----|------------|-----|------------|
|            |                                       | Age-standardized incidence proxy |           | ILI×LAB |           | ILI |            | LAB |            |
|            |                                       | No.                              | (95% CI)  | No.     | (95% CI)  | No. | (95% CI)   | No. | (95% CI)   |
| No lag     | Time series regression                | 109                              | (-3, 221) | 136     | (27, 245) | 19  | (-96, 134) | 76  | (-38, 191) |
|            | Linear regression                     | 125                              | (-9, 259) | 149     | (15, 284) | 43  | (-91, 176) | 95  | (-38, 229) |
|            | Poisson regression with log link      | 120                              | (37, 202) | 141     | (58, 225) | 31  | (-52, 113) | 85  | (3, 168)   |
|            | Poisson regression with identity link | 150                              | (65, 236) | 169     | (83, 255) | 83  | (-2, 168)  | 130 | (46, 215)  |
| 2-week lag | Time series regression                | 145                              | (36, 255) | 125     | (18, 232) | 33  | (-79, 145) | 119 | (7, 231)   |
|            | Linear regression                     | 164                              | (35, 294) | 141     | (10, 271) | 60  | (-69, 190) | 141 | (12, 271)  |
|            | Poisson regression with log link      | 156                              | (73, 240) | 131     | (47, 215) | 49  | (-34, 132) | 128 | (45, 211)  |
|            | Poisson regression with identity link | 181                              | (96, 266) | 153     | (68, 239) | 95  | (10, 180)  | 168 | (83, 253)  |

ILI = influenza like illness based on general practitioners (GP) consultations; LAB = laboratory specimens positive for influenza; ILI×LAB

= GP consultations associated with influenza.
